# Supplementary material for: The proteome of mouse vestibular hair bundles over development
Source: PubMed Central journal article supplement (PMC4570149; doi:10.1038/sdata.2015.47), 2015-09-15

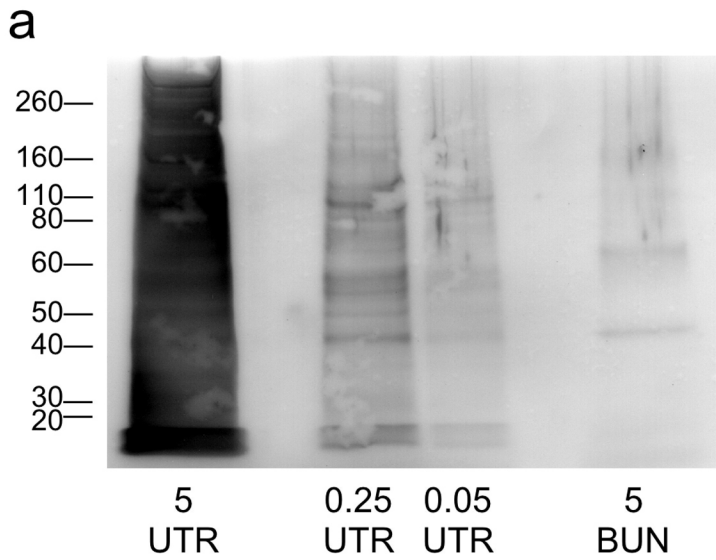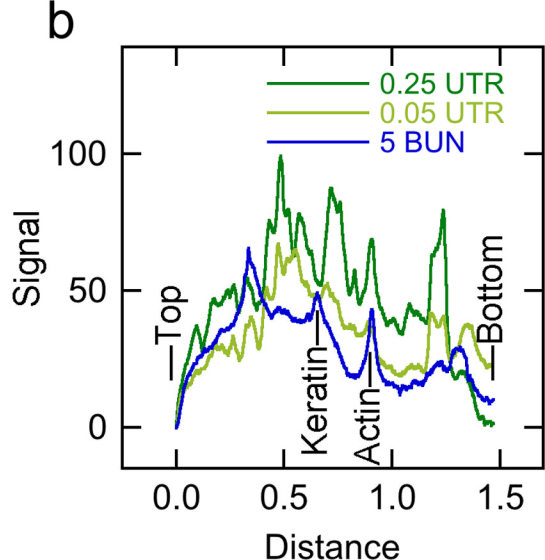

Supplement: sdata201547-s2.pdf [file sdata201547-s2.pdf]
